# Supplementary material for: N-Methyl stereochemistry in tropinone: the conformational flexibility of the tropane motif
Source: Royal Society of Chemistry journal article supplement (doi:10.1039/c000528b), 2010-01-01
Supplement: c000528b.pdf [file c000528b.pdf]

***N*-Methyl Stereochemistry in Tropinone:  
The conformational flexibility of the tropane motif**

**SUPPLEMENTARY INFORMATION**

Emilio J. Cocinero, Alberto Lesarri<sup>†\*</sup>, Patricia Écija, Jens-Uwe Grabow<sup>††</sup>, José A. Fernández and  
Fernando Castaño

Departamento de Química Física,  
Facultad de Ciencia y Tecnología,  
Universidad del País Vasco (UPV-EHU)  
Apartado 644  
48080 Bilbao (Spain)

\* Corresponding author.

<sup>†</sup> *Permanent address:*

Departamento de Química Física y Química Inorgánica,  
Facultad de Ciencias,  
Universidad de Valladolid  
Calle Doctor Mergelina, s/n,  
47011 Valladolid (Spain)  
Tel.: +34-983-423206 / Fax: +34-983-423013  
lesarri@qf.uva.es

<sup>††</sup> *Permanent address:*

Institut für Physikalische Chemie und Elektrochemie,  
Lehrgebiet A,  
Gottfried-Wilhelm-Leibniz-Universität,  
Callinstrasse 3A,  
D-30167 Hannover (Germany)

**Table S1.** Rotational transitions and residuals (MHz) of equatorial tropinone (parent species).

| J' K' <sub>-1</sub> K' <sub>+1</sub> | J'' K'' <sub>-1</sub> K'' <sub>+1</sub> | F' F'' | obs. <sup>a</sup> | o.-c. <sup>b</sup> | J' K' <sub>-1</sub> K' <sub>+1</sub> | J'' K'' <sub>-1</sub> K'' <sub>+1</sub> | F' F'' | obs.      | o.-c.  |
|--------------------------------------|-----------------------------------------|--------|-------------------|--------------------|--------------------------------------|-----------------------------------------|--------|-----------|--------|
| 2 0 2                                | 1 0 1                                   | 3 2    | 4557.984          | 0.001              | 5 3 2                                | 4 3 1                                   | 6 5    | 11402.721 | -0.001 |
|                                      |                                         | 2 1    | 4558.074          | 0.003              | 6 0 6                                | 5 0 5                                   | 7 6    | 13634.410 | 0.002  |
|                                      |                                         | 2 2    | 4558.714          | 0.000              |                                      |                                         | 6 5    | 13634.548 | 0.000  |
| 3 0 3                                | 2 0 2                                   | 4 3    | 6833.842          | 0.000              |                                      |                                         | 5 4    | 13634.419 | -0.002 |
|                                      |                                         | 3 2    | 6833.936          | 0.001              | 6 1 5                                | 5 1 4                                   | 7 6    | 13805.177 | 0.001  |
|                                      |                                         | 2 1    | 6833.957          | -0.004             |                                      |                                         | 6 5    | 13805.227 | -0.003 |
| 3 1 2                                | 2 1 1                                   | 4 3    | 6907.187          | 0.000              |                                      |                                         | 5 4    | 13805.148 | -0.002 |
|                                      |                                         | 3 2    | 6907.350          | 0.000              | 6 1 6                                | 5 1 5                                   | 7 6    | 13530.157 | 0.000  |
|                                      |                                         | 2 1    | 6906.957          | -0.008             |                                      |                                         | 6 5    | 13530.231 | 0.001  |
| 3 1 3                                | 2 1 2                                   | 4 3    | 6769.017          | 0.001              |                                      |                                         | 5 4    | 13530.212 | -0.001 |
|                                      |                                         | 3 2    | 6769.261          | -0.002             | 6 2 4                                | 5 2 3                                   | 7 6    | 13715.539 | 0.000  |
|                                      |                                         | 2 1    | 6769.242          | 0.006              |                                      |                                         | 6 5    | 13715.519 | -0.001 |
| 4 0 4                                | 3 0 3                                   | 5 4    | 9105.921          | 0.000              |                                      |                                         | 5 4    | 13715.550 | 0.002  |
|                                      |                                         | 4 3    | 9106.027          | 0.000              | 6 2 5                                | 5 2 4                                   | 7 6    | 13672.100 | -0.001 |
|                                      |                                         | 3 2    | 9105.969          | -0.001             |                                      |                                         | 6 5    | 13672.214 | 0.000  |
| 4 1 3                                | 3 1 2                                   | 5 4    | 9208.055          | 0.001              | 6 3 3                                | 5 3 2                                   | 7 6    | 13685.385 | 0.000  |
|                                      |                                         | 4 3    | 9208.138          | 0.003              |                                      |                                         | 6 5    | 13685.548 | -0.005 |
|                                      |                                         | 3 2    | 9207.974          | 0.000              |                                      |                                         | 5 4    | 13685.351 | -0.006 |
|                                      |                                         | 4 4    | 9207.496          | 0.002              | 6 3 4                                | 5 3 3                                   | 7 6    | 13684.167 | 0.007  |
| 4 1 4                                | 3 1 3                                   | 5 4    | 9023.987          | -0.001             |                                      |                                         | 6 5    | 13684.343 | 0.006  |
|                                      |                                         | 4 3    | 9024.122          | 0.001              |                                      |                                         | 5 4    | 13684.129 | -0.002 |
|                                      |                                         | 3 2    | 9024.110          | -0.005             | 7 0 7                                | 6 0 6                                   | 8 7    | 15889.295 | 0.003  |
| 4 2 2                                | 3 2 1                                   | 5 4    | 9130.187          | 0.000              |                                      |                                         | 7 6    | 15889.446 | 0.001  |
|                                      |                                         | 4 3    | 9130.399          | 0.000              |                                      |                                         | 6 5    | 15889.295 | -0.004 |
| 4 2 3                                | 3 2 2                                   | 5 4    | 9117.526          | 0.004              | 7 1 6                                | 6 1 5                                   | 8 7    | 16100.517 | 0.000  |
|                                      |                                         | 4 3    | 9117.827          | 0.002              |                                      |                                         | 7 6    | 16100.574 | 0.000  |
|                                      |                                         | 3 2    | 9117.448          | 0.003              |                                      |                                         | 6 5    | 16100.499 | 0.001  |
| 5 0 5                                | 4 0 4                                   | 6 5    | 11373.088         | 0.000              | 7 1 7                                | 6 1 6                                   | 8 7    | 15780.991 | 0.001  |
|                                      |                                         | 5 4    | 11373.210         | -0.001             |                                      |                                         | 7 6    | 15781.055 | 0.001  |
|                                      |                                         | 4 3    | 11373.112         | 0.000              |                                      |                                         | 6 5    | 15781.031 | 0.000  |
| 5 1 4                                | 4 1 3                                   | 6 5    | 11507.527         | 0.001              | 7 2 5                                | 6 2 4                                   | 8 7    | 16015.714 | -0.001 |
|                                      |                                         | 5 4    | 11507.583         | -0.002             |                                      |                                         | 7 6    | 16015.655 | 0.002  |
|                                      |                                         | 4 3    | 11507.487         | 0.002              |                                      |                                         | 6 5    | 16015.728 | 0.001  |
| 5 1 5                                | 4 1 4                                   | 6 5    | 11277.769         | 0.000              | 7 2 6                                | 6 2 5                                   | 8 7    | 15947.570 | 0.000  |
|                                      |                                         | 5 4    | 11277.858         | -0.003             |                                      |                                         | 7 6    | 15947.653 | -0.002 |
| 5 2 3                                | 4 2 2                                   | 6 5    | 11420.491         | 0.001              | 7 3 4                                | 6 3 3                                   | 8 7    | 15969.366 | 0.002  |
|                                      |                                         | 5 4    | 11420.546         | -0.001             |                                      |                                         | 7 6    | 15969.460 | 0.000  |
|                                      |                                         | 4 3    | 11420.480         | -0.003             |                                      |                                         | 6 5    | 15969.352 | -0.004 |
| 5 2 4                                | 4 2 3                                   | 6 5    | 11395.354         | 0.001              | 7 3 5                                | 6 3 4                                   | 7 6    | 15966.729 | 0.002  |
|                                      |                                         | 5 4    | 11395.522         | 0.000              |                                      |                                         | 6 5    | 15966.609 | 0.000  |
|                                      |                                         | 4 3    | 11395.331         | -0.003             |                                      |                                         |        |           |        |
|                                      |                                         | 5 5    | 11395.825         | 0.000              |                                      |                                         |        |           |        |
|                                      |                                         | 4 4    | 11394.956         | 0.002              |                                      |                                         |        |           |        |

<sup>a</sup>Observed. <sup>b</sup>Observed minus calculated.

**Table S2.** Rotational transitions and residuals (MHz) of the  $^{13}\text{C}$  and  $^{18}\text{O}$  monosubstituted isotopologues of equatorial tropinone.

|                          |                             |     |     | $^{13}\text{C}_1\text{-}^{13}\text{C}_5$ |                    | $^{13}\text{C}_2\text{-}^{13}\text{C}_4$ |        | $^{13}\text{C}_3$ |        | $^{13}\text{C}_6\text{-}^{13}\text{C}_7$ |        | $^{13}\text{C}_9$ |        | $^{18}\text{O}$ |        |
|--------------------------|-----------------------------|-----|-----|------------------------------------------|--------------------|------------------------------------------|--------|-------------------|--------|------------------------------------------|--------|-------------------|--------|-----------------|--------|
| J' K' $_{-1}$ K' $_{+1}$ | J'' K'' $_{-1}$ K'' $_{+1}$ | F'  | F'' | obs. <sup>a</sup>                        | o.-c. <sup>b</sup> | obs.                                     | o.-c.  | obs.              | o.-c.  | obs.                                     | o.-c.  | obs.              | o.-c.  | obs.            | o.-c.  |
| 3 0 3                    | 2 0 2                       | 4 3 | 3 2 | 6818.494                                 | 0.000              | 6806.736                                 | 0.001  | 6791.671          | 0.000  | 6807.602                                 | 0.001  | 6726.311          | -0.001 | 6601.753        | -0.001 |
|                          |                             | 3 2 | 2 1 | 6818.594                                 | 0.002              | 6806.832                                 | -0.001 | 6791.761          | -0.001 | 6807.690                                 | 0.001  |                   |        |                 |        |
| 3 1 2                    | 2 1 1                       | 4 3 | 3 2 | 6897.202                                 | 0.000              | 6885.568                                 | 0.001  | 6863.657          | -0.001 | 6874.818                                 | 0.001  | 6795.148          | -0.001 | 6669.748        | 0.002  |
|                          |                             | 3 2 | 2 1 | 6897.366                                 | 0.000              | 6885.729                                 | -0.001 | 6863.822          | 0.002  | 6874.978                                 | -0.001 | 6795.313          | 0.002  | 6669.906        | -0.002 |
| 3 1 3                    | 2 1 2                       | 4 3 | 3 2 | 6749.608                                 | 0.000              | 6737.790                                 | 0.001  | 6727.868          | -0.001 | 6747.733                                 | 0.003  | 6664.954          | -0.001 | 6540.935        | 0.001  |
|                          |                             | 3 2 | 2 1 | 6749.853                                 | -0.003             | 6738.033                                 | -0.004 |                   |        | 6747.970                                 | -0.006 | 6665.202          | 0.001  |                 |        |
| 4 0 4                    | 3 0 3                       | 5 4 | 4 3 | 9084.570                                 | 0.000              | 9068.848                                 | 0.000  | 9049.919          | 0.001  | 9071.732                                 | 0.000  | 8963.252          | 0.000  | 8797.386        | 0.000  |
|                          |                             | 4 3 | 3 2 | 9084.684                                 | 0.001              | 9068.964                                 | 0.002  | 9050.022          | 0.000  | 9071.832                                 | -0.001 | 8963.353          | 0.000  | 8797.484        | 0.000  |
|                          |                             | 3 2 | 2 1 | 9084.617                                 | -0.001             | 9068.895                                 | -0.001 |                   |        |                                          |        |                   |        |                 |        |
| 4 1 4                    | 3 1 3                       | 5 4 | 4 3 | 8997.898                                 | 0.001              | 8982.130                                 | 0.002  | 8969.180          | 0.000  | 8995.804                                 | 0.003  | 8885.411          | 0.000  | 8720.101        | 0.001  |
|                          |                             | 4 3 | 3 2 | 8998.032                                 | 0.001              | 8982.263                                 | 0.000  | 8969.312          | 0.000  | 8995.932                                 | 0.000  | 8885.542          | 0.000  | 8720.228        | -0.002 |

<sup>a</sup>Observed. <sup>b</sup>Observed minus calculated.

**Table S3.** Rotational transitions and residuals (MHz) of the  $^{15}\text{N}$  isotopologues of equatorial tropinone.

| $^{15}\text{N}$ |         |         |     |          |          |                   |                    |
|-----------------|---------|---------|-----|----------|----------|-------------------|--------------------|
| J'              | K'_{-1} | K'_{+1} | J'' | K''_{-1} | K''_{+1} | obs. <sup>a</sup> | o.-c. <sup>b</sup> |
| 3               | 0       | 3       | 2   | 0        | 2        | 6808.968          | 0.000              |
| 3               | 1       | 2       | 2   | 1        | 1        | 6879.107          | 0.000              |
| 3               | 1       | 3       | 2   | 1        | 2        | 6746.706          | 0.000              |
| 4               | 0       | 4       | 3   | 0        | 3        | 9073.199          | 0.000              |
| 4               | 1       | 4       | 3   | 1        | 3        | 8994.280          | 0.000              |

<sup>a</sup>Observed. <sup>b</sup>Observed minus calculated.

**Table S4.** Rotational transitions and residuals (MHz) of axial tropinone (parent species).

| J' K' <sub>-1</sub> K' <sub>+1</sub> | J'' K'' <sub>-1</sub> K'' <sub>+1</sub> | F' F'' | obs. <sup>a</sup> | o.-c. <sup>b</sup> | J' K' <sub>-1</sub> K' <sub>+1</sub> | J'' K'' <sub>-1</sub> K'' <sub>+1</sub> | F' F''    | obs.      | o.-c.  |
|--------------------------------------|-----------------------------------------|--------|-------------------|--------------------|--------------------------------------|-----------------------------------------|-----------|-----------|--------|
| 2 0 2                                | 1 0 1                                   | 3 2    | 5110.184          | 0.001              | 4 2 2                                | 3 2 1                                   | 5 4       | 10372.069 | 0.000  |
|                                      |                                         | 2 1    | 5110.070          | 0.005              |                                      |                                         | 4 3       | 10371.778 | 0.000  |
|                                      |                                         | 2 2    | 5109.233          | -0.001             |                                      |                                         | 3 2       | 10372.156 | -0.002 |
| 2 1 2                                | 1 1 1                                   | 1 1    | 5111.546          | 0.004              | 4 2 3                                | 3 2 2                                   | 5 4       | 10238.222 | 0.000  |
|                                      |                                         | 3 2    | 5013.174          | 0.003              |                                      |                                         | 4 3       | 10237.829 | 0.000  |
|                                      |                                         | 2 1    | 5012.281          | -0.002             |                                      |                                         | 3 2       | 10238.322 | 0.000  |
|                                      |                                         | 1 0    | 5013.704          | -0.005             |                                      |                                         | 5 0 5     | 4 0 4     | 6 5    |
| 3 0 3                                | 2 0 2                                   | 1 1    | 5013.584          | -0.004             | 5 1 4                                | 4 1 3                                   | 5 4       | 12572.587 | -0.001 |
|                                      |                                         | 4 3    | 7630.058          | 0.000              |                                      |                                         | 4 3       | 12572.659 | 0.000  |
|                                      |                                         | 3 2    | 7629.937          | -0.001             |                                      |                                         | 6 5       | 13013.978 | 0.000  |
| 3 1 2                                | 2 1 1                                   | 2 1    | 7629.908          | 0.003              | 5 1 5                                | 4 1 4                                   | 5 4       | 13013.874 | 0.002  |
|                                      |                                         | 4 3    | 7845.169          | 0.000              |                                      |                                         | 6 5       | 12479.516 | 0.000  |
|                                      |                                         | 3 2    | 7844.915          | 0.000              |                                      |                                         | 5 4       | 12479.422 | 0.002  |
| 3 1 3                                | 2 1 2                                   | 2 1    | 7845.248          | 0.001              | 5 2 3                                | 4 2 2                                   | 4 3       | 12479.468 | 0.000  |
|                                      |                                         | 4 3    | 7510.893          | 0.000              |                                      |                                         | 6 5       | 13018.083 | -0.003 |
|                                      |                                         | 3 2    | 7510.613          | -0.001             |                                      |                                         | 5 4       | 13017.961 | -0.001 |
| 3 2 1                                | 2 2 0                                   | 2 1    | 7510.819          | 0.001              | 5 2 4                                | 4 2 3                                   | 4 3       | 13018.105 | 0.000  |
|                                      |                                         | 3 2    | 7743.807          | 0.000              |                                      |                                         | 6 5       | 12779.420 | -0.001 |
|                                      |                                         | 2 1    | 7745.086          | -0.001             |                                      |                                         | 5 4       | 12779.199 | -0.001 |
| 3 2 2                                | 2 2 1                                   | 3 2    | 7686.523          | 0.005              | 6 0 6                                | 5 0 5                                   | 4 3       | 12779.445 | 0.001  |
|                                      |                                         | 2 1    | 7687.904          | 0.000              |                                      |                                         | 7 6       | 15014.911 | 0.002  |
|                                      |                                         | 5 4    | 10115.714         | 0.000              |                                      |                                         | 6 5       | 15014.813 | -0.005 |
| 4 0 4                                | 3 0 3                                   | 4 3    | 10115.591         | -0.001             | 6 1 5                                | 5 1 4                                   | 5 4       | 15014.877 | -0.003 |
|                                      |                                         | 3 2    | 10115.645         | -0.002             |                                      |                                         | 7 6       | 15558.582 | 0.000  |
|                                      |                                         | 5 4    | 10439.994         | 0.000              |                                      |                                         | 6 5       | 15558.479 | 0.000  |
|                                      |                                         | 4 3    | 10439.856         | 0.000              |                                      |                                         | 7 6       | 14950.477 | 0.001  |
| 4 1 3                                | 3 1 2                                   | 3 2    | 10440.001         | 0.001              | 6 1 6                                | 5 1 5                                   | 6 5       | 14950.408 | 0.003  |
|                                      |                                         | 5 4    | 9999.888          | 0.001              |                                      |                                         | 5 4       | 14950.445 | 0.004  |
|                                      |                                         | 4 3    | 9999.743          | 0.000              |                                      |                                         | 7 6       | 15665.556 | -0.001 |
| 4 1 4                                | 3 1 3                                   | 3 2    | 9999.819          | -0.001             | 6 2 4                                | 5 2 3                                   | 6 5       | 15665.489 | 0.000  |
|                                      |                                         | 6 2 4  | 5 2 3             | 7 6                |                                      |                                         | 15309.018 | 0.002     |        |
|                                      |                                         | 6 2 5  | 5 2 4             | 7 6                |                                      |                                         | 15308.871 | 0.002     |        |

<sup>a</sup>Observed. <sup>b</sup>Observed minus calculated.

**Table S5.** Rotational transitions and residuals (MHz) of the  $^{13}\text{C}$  monosubstituted isotopologues of axial tropinone.

|                          |                             |        | $^{13}\text{C}_1\text{-}^{13}\text{C}_5$ |                    | $^{13}\text{C}_2\text{-}^{13}\text{C}_4$ |        | $^{13}\text{C}_3$ |        | $^{13}\text{C}_6\text{-}^{13}\text{C}_7$ |        | $^{13}\text{C}_9$ |        |
|--------------------------|-----------------------------|--------|------------------------------------------|--------------------|------------------------------------------|--------|-------------------|--------|------------------------------------------|--------|-------------------|--------|
| J' K' $_{-1}$ K' $_{+1}$ | J'' K'' $_{-1}$ K'' $_{+1}$ | F' F'' | obs. <sup>a</sup>                        | o.-c. <sup>b</sup> | obs.                                     | o.-c.  | obs.              | o.-c.  | obs.                                     | o.-c.  | obs.              | o.-c.  |
| 3 0 3                    | 2 0 2                       | 4 3    | 7611.230                                 | 0.001              | 7605.869                                 | -0.001 | 7588.123          | -0.001 | 7587.250                                 | -0.001 | 7530.551          | 0.002  |
|                          |                             | 3 2    | 7611.112                                 | 0.000              | 7605.752                                 | 0.000  | 7588.005          | 0.000  | 7587.124                                 | -0.001 |                   |        |
|                          |                             | 2 1    | 7611.077                                 | 0.001              | 7605.717                                 | 0.000  |                   |        |                                          |        |                   |        |
| 3 1 2                    | 2 1 1                       | 4 3    | 7815.910                                 | 0.000              | 7810.366                                 | 0.000  | 7801.501          | 0.001  | 7818.908                                 | 0.000  | 7757.287          | 0.000  |
|                          |                             | 3 2    | 7495.645                                 | -0.001             | 7490.634                                 | 0.000  | 7468.940          | 0.000  | 7465.484                                 | 0.002  | 7408.330          | -0.006 |
| 3 1 3                    | 2 1 2                       | 3 2    | 7495.367                                 | 0.000              | 7490.355                                 | 0.000  | 7468.657          | -0.004 | 7465.198                                 | -0.004 |                   |        |
|                          |                             | 2 1    |                                          |                    |                                          |        |                   |        | 7465.411                                 | 0.003  |                   |        |
|                          |                             | 4 0 4  | 3 0 3                                    | 5 4                | 10094.288                                | -0.001 | 10087.092         | 0.000  | 10060.657                                | -0.001 | 10051.767         | 0.000  |
| 4 0 4                    | 3 0 3                       | 4 3    | 10094.169                                | 0.000              | 10086.972                                | 0.001  | 10060.538         | 0.002  | 10051.643                                | 0.001  | 9978.494          | -0.005 |
|                          |                             | 5 4    | 9980.557                                 | 0.002              | 9973.853                                 | 0.001  | 9944.199          | 0.002  | 9937.363                                 | 0.001  | 9861.911          | -0.001 |
|                          |                             | 4 3    | 9980.410                                 | -0.001             | 9973.710                                 | 0.001  | 9944.054          | 0.001  | 9937.215                                 | -0.001 | 9861.772          | 0.005  |

<sup>a</sup>Observed. <sup>b</sup>Observed minus calculated.

**Table S6.** Substitution coordinates of tropinone.

| <i>Equatorial</i> |                                       |            |                      |                               |          |          |
|-------------------|---------------------------------------|------------|----------------------|-------------------------------|----------|----------|
|                   | Substitution coordinates <sup>a</sup> |            |                      | <i>Ab initio</i> <sup>b</sup> |          |          |
|                   | <i> a </i>                            | <i> b </i> | <i> c </i>           | <i>a</i>                      | <i>b</i> | <i>c</i> |
| C <sub>1</sub>    | 0.568(5) <sup>c</sup>                 | 1.145(3)   | [0.000] <sup>d</sup> | -0.568                        | -1.143   | -0.080   |
| C <sub>2</sub>    | 0.882(4)                              | 1.282(2)   | 0.535(7)             | 0.872                         | -1.279   | -0.596   |
| C <sub>3</sub>    | 1.6511(17)                            | [0.000]    | 0.300(9)             | 1.641                         | 0.000    | -0.313   |
| C <sub>4</sub>    | 0.882(4)                              | 1.282(2)   | 0.535(7)             | 0.873                         | 1.280    | -0.593   |
| C <sub>5</sub>    | 0.568(5)                              | 1.145(3)   | [0.000]              | -0.567                        | 1.143    | -0.077   |
| C <sub>6</sub>    | 0.640(12)                             | 0.769(9)   | 1.433(6)             | -0.576                        | 0.774    | 1.432    |
| C <sub>7</sub>    | 0.640(12)                             | 0.769(9)   | 1.433(6)             | -0.578                        | -0.778   | 1.430    |
| N                 | 1.1647(15)                            | [0.000]    | 0.776(2)             | -1.185                        | 0.001    | -0.773   |
| C <sub>9</sub>    | 2.6236(11)                            | [0.000]    | 0.708(4)             | -2.641                        | 0.001    | -0.628   |
| O                 | 2.8123(11)                            | [0.000]    | [0.000]              | 2.778                         | 0.000    | 0.137    |

| <i>Axial</i>   |                          |            |            |                  |          |          |
|----------------|--------------------------|------------|------------|------------------|----------|----------|
|                | Substitution coordinates |            |            | <i>Ab initio</i> |          |          |
|                | <i> a </i>               | <i> b </i> | <i> c </i> | <i>a</i>         | <i>b</i> | <i>c</i> |
| C <sub>1</sub> | 0.666(2)                 | 0.216(7)   | 1.1488(13) | 0.658            | 0.248    | -1.147   |
| C <sub>2</sub> | 0.645(2)                 | 0.571(3)   | 1.2791(12) | -0.614           | -0.630   | -1.276   |
| C <sub>3</sub> | 1.4603(11)               | 0.451(3)   | [0.000]    | -1.430           | -0.524   | 0.000    |
| C <sub>4</sub> | 0.645(2)                 | 0.571(3)   | 1.2791(12) | -0.614           | -0.637   | 1.273    |
| C <sub>5</sub> | 0.666(2)                 | 0.216(7)   | 1.1488(13) | 0.656            | 0.242    | 1.148    |
| C <sub>6</sub> | 0.388(4)                 | 1.6909(9)  | 0.775(2)   | 0.270            | 1.688    | 0.782    |
| C <sub>7</sub> | 0.388(4)                 | 1.6909(9)  | 0.775(2)   | 0.275            | 1.692    | -0.775   |
| C <sub>9</sub> | 1.9282(9)                | 1.5891(12) | [0.000]    | 2.021            | -1.485   | -0.002   |

<sup>a</sup>Principal inertial axis denoted as *a*, *b*, *c*. Coordinates in Angström. <sup>b</sup>MP2/6-311++G(d,p).

<sup>c</sup>Errors in parenthesis in units of the last digit, calculated as the sum of the standard errors and the Costain's estimates:  $\delta z = K/|z|$  ( $K=0.15$  Å). <sup>d</sup>Values in square brackets constrained to zero because of small or imaginary coordinates.
